# Supplementary material
Source: MDPI journal article supplement (https://www.mdpi.com/2075-4701/12/3/451)
Supplement: s1 [file s1]

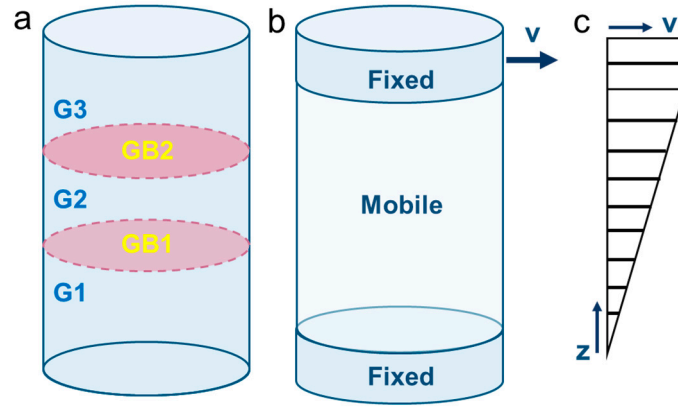

Supplementary Figure S1. Schematic showing the set-up and loading profile. (a) Schematic showing the set-up of the cylindrical bicrystal simulation cell used in this work. (b) The atoms in the bottom and upper slabs are fixed relative to each other and move as a rigid body during shearing. (c) A shear velocity of  $1 \text{ m s}^{-1}$  was applied to the rigid slab (consisting of fixed atoms) of the top grain. And a velocity profile with a linear gradient from 0 to  $1 \text{ m s}^{-1}$  was assigned to the dynamic atoms along the axial direction.

Supplementary Table S1. Migration distance of GB<sub>1</sub> and separation distance between two GBs versus shear displacement for  $10^\circ$  low-angle grain boundary (LAGB) annihilated at  $10^\circ$  LAGB (Figure 11).

| Shear displacement (nm) | Migration distance (nm) | GB distance (nm) |
|-------------------------|-------------------------|------------------|
| 0                       | 0                       | 9.0167           |
| 0.16377                 | 0.1516                  | 9.1241           |
| 0.35307                 | 0.6354                  | 8.8273           |
| 0.56757                 | 1.4562                  | 8.2211           |
| 0.75087                 | 2.0802                  | 7.5918           |
| 0.94417                 | 2.8896                  | 7.0254           |
| 1.13287                 | 3.6428                  | 6.3468           |
| 1.34437                 | 4.3667                  | 6.0347           |
| 1.54247                 | 6.0908                  | 4.0522           |
| 1.74737                 | 8.6188                  | 0                |

Supplementary Table S2. Migration distance of GB<sub>1</sub> and separation distance between two GBs versus shear displacement for 10° LAGB annihilated at –10° LAGB (Figure 11).

| Shear displacement (nm) | Migration distance (nm) | GB distance (nm) |
|-------------------------|-------------------------|------------------|
| 0                       | 0                       | 9. 8566          |
| 0. 1186                 | 0. 6486                 | 8. 708           |
| 0. 2901                 | 0. 7311                 | 8. 3986          |
| 0. 4607                 | 0. 9924                 | 7. 5473          |
| 0. 6659                 | 1. 496                  | 6. 5424          |
| 0. 88                   | 2. 4653                 | 5. 4232          |
| 1. 0923                 | 4. 2164                 | 2. 6158          |
| 1. 3203                 | 5. 3753                 | 0. 5594          |

Supplementary Table S3. Migration distance of GB<sub>1</sub> and separation distance between two GBs versus shear displacement for 10° LAGB annihilated at 30° high-angle grain boundary (HAGB) (Figure 31).

| Shear displacement (nm) | Migration distance (nm) | GB distance (nm) |
|-------------------------|-------------------------|------------------|
| 0                       | 0                       | 9. 4161          |
| 0. 1316                 | 0. 7254                 | 8. 6907          |
| 0. 2802                 | 1. 2337                 | 8. 1824          |
| 0. 4788                 | 2. 2249                 | 7. 1912          |
| 0. 6778                 | 2. 9563                 | 6. 4598          |
| 0. 8848                 | 4. 4154                 | 5. 0007          |
| 1. 0905                 | 4. 6592                 | 4. 7569          |
| 1. 2629                 | 5. 8936                 | 3. 5225          |
| 1. 3371                 | 8. 1656                 | 1. 2505          |
| 1. 4885                 | 9. 4148                 | 0. 0013          |

Supplementary Table S4. Migration distance of GB<sub>1</sub> and separation distance between two GBs versus shear displacement for 10° LAGB annihilated at −30° HAGB (Figure 3l).

| Shear displacement (nm) | Migration distance (nm) | GB distance (nm) |
|-------------------------|-------------------------|------------------|
| 0                       | 0                       | 9.199            |
| 0.09                    | 0.0133                  | 9.1857           |
| 0.236                   | 0.7253                  | 8.4737           |
| 0.4403                  | 1.957                   | 7.242            |
| 0.6615                  | 2.6927                  | 6.5063           |
| 0.831                   | 3.69                    | 5.509            |
| 1.038                   | 4.6711                  | 4.5279           |
| 1.1956                  | 6.6612                  | 2.52             |
| 1.3452                  | 8.9149                  | 0                |
